# Supplementary material for: Regulation of BCL-X splicing reveals a role for the polypyrimidine tract binding protein (PTBP1/hnRNP I) in alternative 5′ splice site selection
Source: PubMed Central journal article supplement — Nucleic Acids Res. 2014 Oct 7;42(19):12070–81. doi: 10.1093/nar/gku922 (PMC4231771; doi:10.1093/nar/gku922), 2014-10-07

**Regulation of BCL-X splicing reveals a role for the Polypyrimidine-tract binding protein (PTBP1/hnRNP I) in alternative 5' splice site selection.**

Pamela Bielli<sup>1,2</sup>, Matteo Bordi<sup>1,2,¥</sup>, Valentina Di Biasio<sup>1,2,§</sup>, Claudio Sette<sup>1,2</sup>

<sup>1</sup>*Department of Biomedicine and Prevention, University of Rome Tor Vergata, Rome, Italy,* <sup>2</sup>*Laboratory of Neuroembryology, Fondazione Santa Lucia, Rome, Italy.*

**Running title:** PTBP1 and alternative 5' splice site selection

**Keywords:** Alternative splicing, 5' splice site, BCL-X, PTBP1.

**Current address:** ¥European Molecular Biology Laboratory (EMBL) Developmental Biology Unit, Heidelberg, German; §IRBM Science Park S.p.A. Pomezia, Rome, Italy

<sup>2</sup>**Corresponding Author:**

Claudio Sette, PhD

Dept. Biomedicine and Prevention

University of Rome Tor Vergata

Via Montpellier 1,

00133 Rome, Italy

Tel. 3906 72596260

FAX 3906 72596268

Email: [claudio.sette@uniroma2.it](mailto:claudio.sette@uniroma2.it)

**Supplemental Table S1. List of the oligonucleotides used in this study.**

| #  | Oligonucleotide name  | sequence 5' → 3'                         | Experiment                                            |
|----|-----------------------|------------------------------------------|-------------------------------------------------------|
| 1  | USP5/Ex14/XhoI/Fw     | agctcgagaagaagttcaccttcggc               | Cloning; Fig.4B,E; S5B                                |
| 2  | USP5/Ex16/HindIII/Rv  | agaagcttatgaccagttcatggcgg               | Cloning; Fig.4B,E; S5B                                |
| 3  | Δ1-500/XhoI/Fw        | agctcgagatgtggaagagaacagg                | Cloning                                               |
| 4  | BGH/PolyA/Rv          | cagtgggagtgacccttc                       | Cloning; Fig.1D;3A,D-F;4B,E;5B-C                      |
| 5  | BCL-X/E2m1/Rv         | ccgaaggagaccaaggccacaat                  | Cloning                                               |
| 6  | BCL-X/E2m2/Rv         | ccgaaggagaggaaggccacaat                  | Cloning                                               |
| 7  | USP5/E15m1/Fw         | agactccggctgctccc                        | Cloning                                               |
| 8  | hnRNPF/HindIII/Fw     | agaagctttatgatgtggccctgagggga            | Cloning                                               |
| 9  | hnRNPF/BamHI/Rv       | agggatccctagtcatagccacctgctgttctg        | Cloning                                               |
| 10 | PTBP1/EcoRI/GFP/Fw    | acgaattcaatggacggcattgtcccag             | Cloning                                               |
| 11 | PTBP1/SalI/GFP/Rv     | acgtgacctagatggtggactggagaagg            | Cloning                                               |
| 12 | hSRp20/PSTI/Fw        | agctcgagatgcatcgtgattcctgtcca            | Cloning                                               |
| 13 | hSRp20/BamHI/Rv       | agggatccctatttctttcatttgacctaga          | Cloning                                               |
| 14 | BCL-X/ATG/Fw          | atgtctcagagcaaccgggagctg                 | Fig. 1B; S1A                                          |
| 15 | BCL-X/TGA/Rv          | tcatttccgactgaagagtgagcc                 | Fig. 1B; S1A                                          |
| 16 | BCL-X/T7/Fw           | attaatacagactcactatagggacagatatcagagcttt | Fig. 1C; 3C                                           |
| 17 | BCL-X/Long/Rv         | tgcgatccgactcaccaata                     | Fig. 1C; 3C                                           |
| 18 | BCL-X-Exon2/Fw        | ccatggcagcagtaaagcaa                     | Fig. 1D; 3A,E,F; 5B; S4A,B,D; S5A                     |
| 19 | BGH RV                | cagtgggagtgacccttc                       | Fig. 1D; 3A,E,F; 3D; 4B,D,E; 5B,C,F,G; S4A,B,D; S5A,B |
| 20 | BCL-XL/ExonJunct/Fw   | aagagaacggcggtgggatac                    | Fig. 2A; S2C,E; S4C                                   |
| 21 | BCL-Xs/ExonJunct/Fw   | gggacagcatatcagagctttgaacaggatac         | Fig. 2A; S2C,E; S4C                                   |
| 22 | BCL-X/ExonJunct/Rv    | tcatttccgactgaagagtgagccca               | Fig. 2A; S2C,E; S4C                                   |
| 23 | BCL-X/E2d/Fw          | ccagggacagcatatcaga                      | Fig. 2B,D; 5A,D,E; S3C                                |
| 24 | BCL-X/E2d/RV          | ccccateccggaagagttcattca                 | Fig. 2B,D; 5A,D,E; S3C                                |
| 25 | BCL-X/E1/Fw           | tggttctgagcttcgcaat                      | Fig. 2D; 5A; S3C                                      |
| 26 | BCL-X/E1/Rv           | cggaggatcatcgacc                         | Fig. 2D; 5A; S3C                                      |
| 27 | BCL-X/I1/Fw           | actgccaggagtgacttt                       | Fig. 2D; 5A; S3C                                      |
| 28 | BCL-X/I1/Rv           | tacccccgttctccgaaa                       | Fig. 2D; 5A; S3C                                      |
| 29 | BCL-X/E2p/Fw          | tccgatcgcagcttgatggc                     | Fig. 2D; 5A; S3C                                      |
| 30 | BCL-X/E2p/RV          | cagccgccgttctctggat                      | Fig. 2D; 5A; S3C                                      |
| 31 | BCL-X/I2/Fw           | tgggccagagtcacacccc                      | Fig. 2D; 5A; S3C                                      |
| 32 | BCL-X/I2/RV           | agggagcctctggtggcag                      | Fig. 2D; 5A; S3C                                      |
| 33 | BCL-X/E3/Fw/CLIPminig | gtggaactctatgggaacaatgca                 | Fig. 3D; 5C                                           |
| 34 | USP5/T7/Fw            | attaatacagactcactatagggcaccctggtcactccg  | Fig. 4C                                               |
| 35 | USP5/Rv/RNAPulldown   | agagtcactaacatgtcggag                    | Fig. 4C                                               |
| 36 | USP5ex16/FW/Clip      | gtctactacacgggcaacagcg                   | Fig. 4D; 5F,G                                         |
| 37 | PTB tot FW            | ggaaggtcaccaacctctg                      | Fig. S2B                                              |
| 38 | PTB tot RV            | ggagagctgtcgttctcag                      | Fig. S2B                                              |
| 39 | siCTRL                | ucuuucucugcuuugcgg                       | Naro et al., 2014                                     |
| 40 | siSRSF1               | ccaaggacauaggacgu                        | Naro et al., 2014                                     |

## Supplemental Figure Legends

**Supplemental Figure S1. BCL-X alternative splicing pattern of minigene resembles pattern of the endogenous gene.** A) RT-PCR analysis of in vivo splicing assays of endogenous BCL-X (left panel) and BCL-X minigene. The p values of Student's t-test are reported. \*\*\*,  $p < 0.001$ . B) Evaluation of the indicated splicing factors expression level by Western-blot analysis.

**Supplemental Figure S2. PTBP1 and BCL-Xs expression correlate with drug-induced apoptosis in glioblastoma cell lines.** A) Western-blot analysis of PTBP1 expression in glioblastoma cell lines (A172, LN229, LN18). B,C) qPCR analysis of PTBP1 (B) and BCL-X isoforms (C) expression in glioblastoma cell lines (mean  $\pm$  SD,  $n=3$ ). D,E) Bar graph representation of immunofluorescence analysis of activated caspase-3 (D) and qPCR analysis of BCL-X isoforms (E) in glioblastoma cell lines treated for 72hrs with temozolomide (100 $\mu$ M) (TMZ 100 $\mu$ M) or DMSO (DMSO), as control (mean  $\pm$  SD,  $n=3$ ). B,C,E) The bar graph of fold variation of each sample was calculated by  $\Delta\Delta$ Ct method as described in the Methods section. B-E) The p values of Student's t-test are reported. \* $p < 0.05$ , \*\*\*,  $p < 0.001$ ; n.s., not significant.

**Supplemental Figure S3. Schematic representation of CLIP assay in presence of low concentration of RNaseI.** A) Schematic representation of RNA isolation. B) Formaldehyde-agarose gel analysis of RNA digestion pattern after 2 hrs of treatment at 4°C with different doses of RNaseI (see Materials and Methods section). C) CLIP of PTBP1 performed in HEK293T, in presence of high concentration (1:5) of RNaseI. Associated BCL-X RNA was quantified by qPCR, using primers described in the scheme. Data are represent fold enrichment relative to the IgG sample (mean  $\pm$  SD,  $n=3$ ).

**Supplemental Figure S4. Mutations in polypyrimidine tract in the B2 element did not affect hnRNP F and SRSF1 splicing activity.** A,B) RT-PCR analysis of the splicing assays performed in HEK293T cells transfected with wt and mutated (E2m1 and E2m2) minigenes in presence of either hnRNP F (A) or SRSF1 (B). The bar graph shows the percentage of BCL-XL (mean  $\pm$  SD,  $n=3$ ). C) qPCR analysis of BCL-X isoforms in HEK293T cells transfected with scramble (CTRL), PTBP1 and PTBP2 (PTBP1/2), and hnRNP F siRNAs. The fold variation was calculated as in Supplemental Figure S2. D) RT-PCR analysis of the splicing assays performed as in

A,B) in presence of suboptimal amount of hnRNP F and PTBP1. A,B) The p values of Student's t-test are reported. \*\*,  $p < 0.01$ ; \*\*\*,  $p < 0.001$ ; n.s., not significant.

**Supplemental Figure S5. Competition between PTBP1 and SRSF1 regulates *BCL-X* and *USP5* splicing.** A) RT-PCR of *in vivo* splicing assay performed in HEK293T transfected with the indicated minigenes, GFP-PTB1 and increasing amounts of Flag-SRSF1. Bar graph (*bottom panel*) shows the percentage of BCL-XL (mean  $\pm$  SD, n=3). B) RT-PCR of *in vivo* splicing assay performed in HEK293T cells transfected with the USP5 minigene and the indicated SR proteins. The bar graph shows the percentage of isoform 2 of USP5 (mean  $\pm$  SD, n=3). A,B) The p values of Student's t-test are reported. \* $p < 0.05$ , \*\*,  $p < 0.01$ ; \*\*\*,  $p < 0.001$ ; n.s., not significant.

A

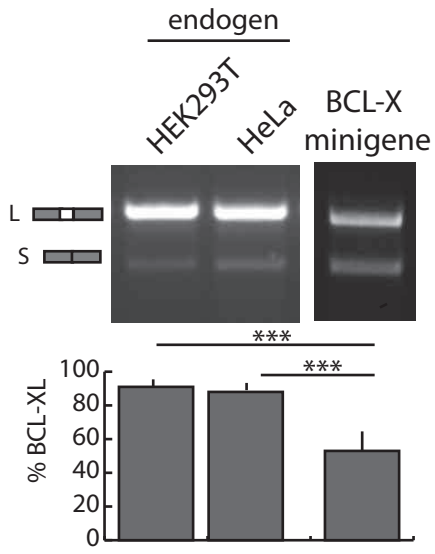

B

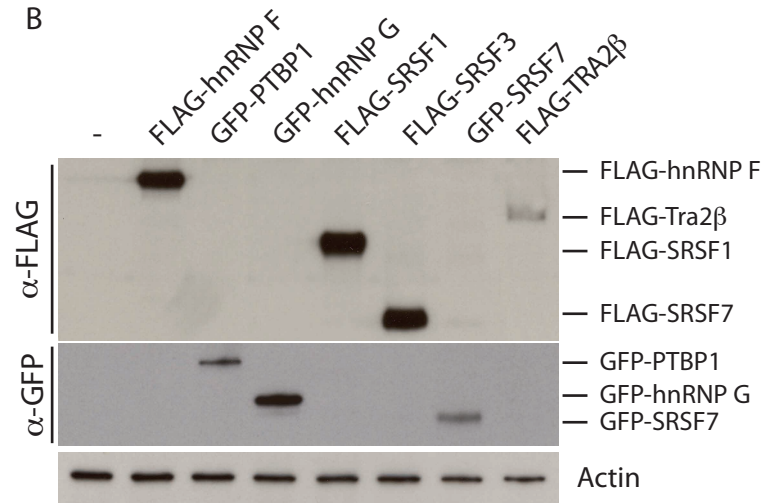

A

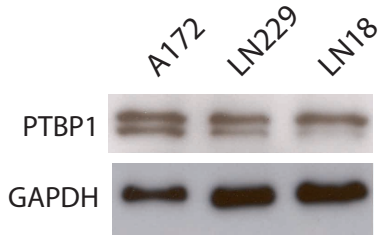

B

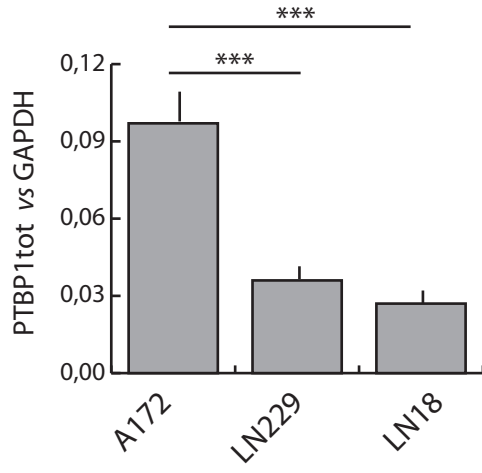

C

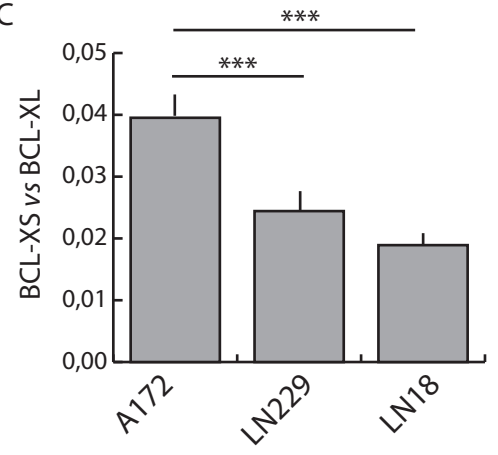

D

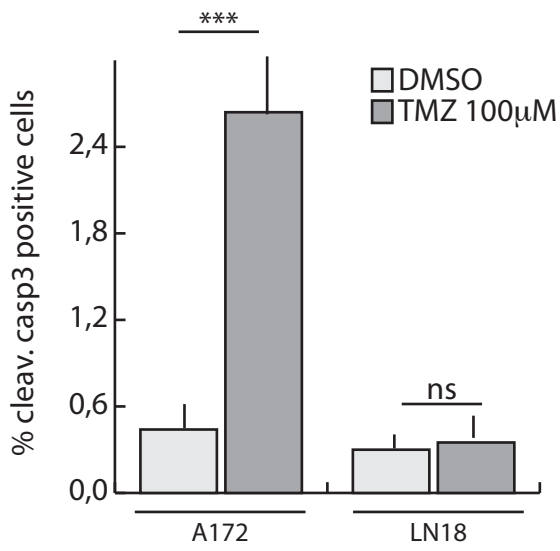

E

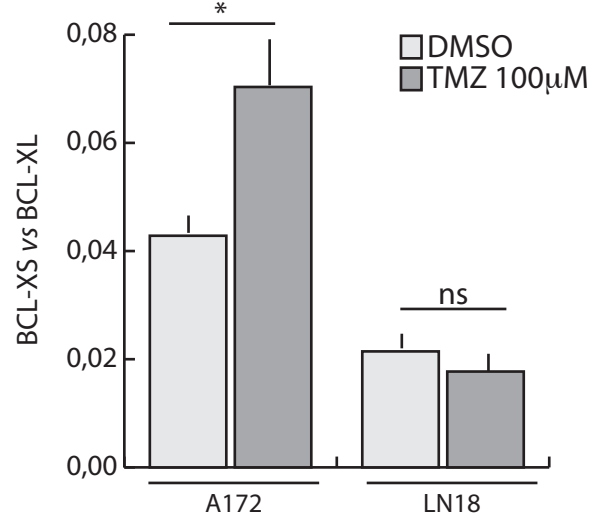

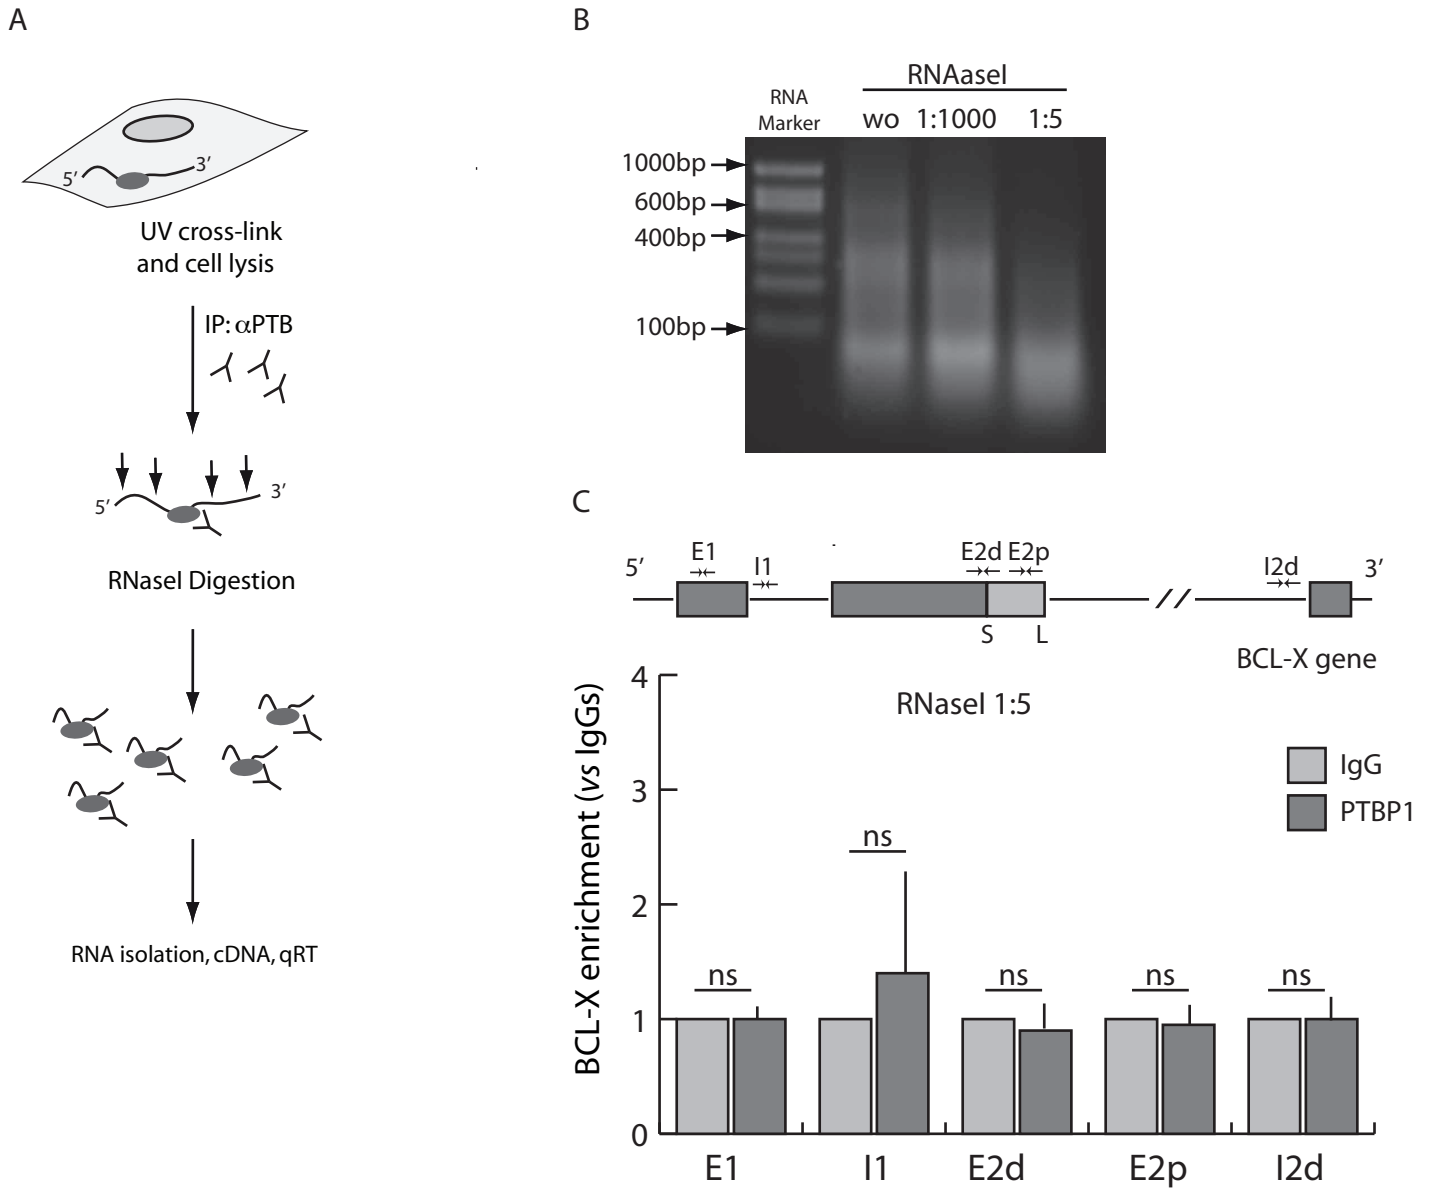

A

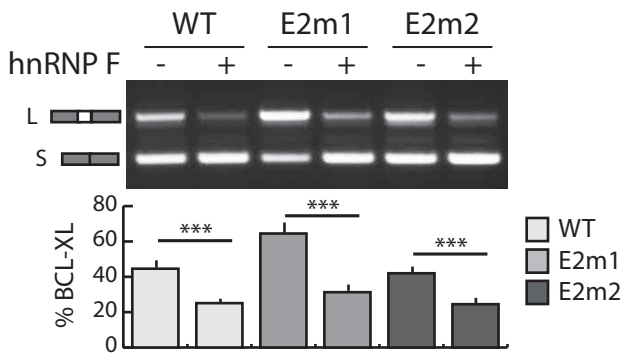

B

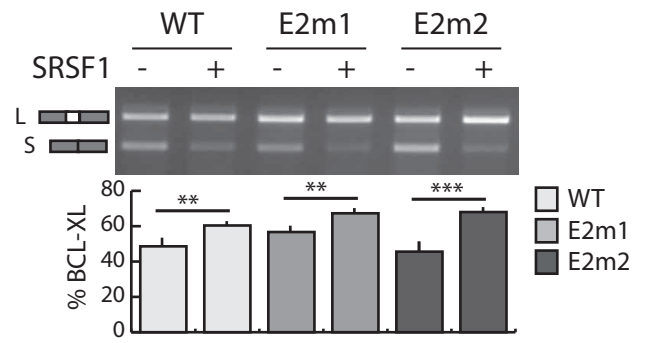

C

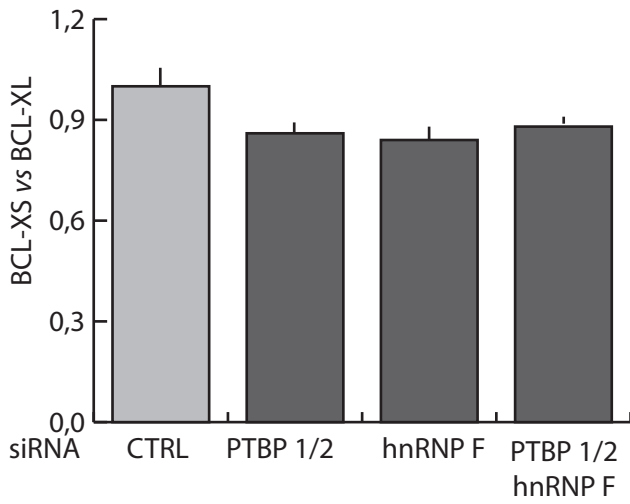

D

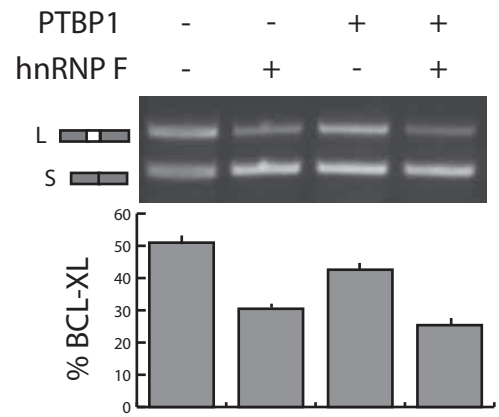



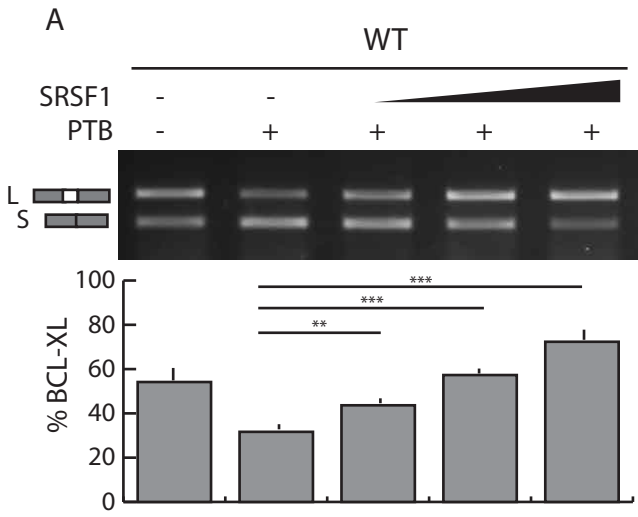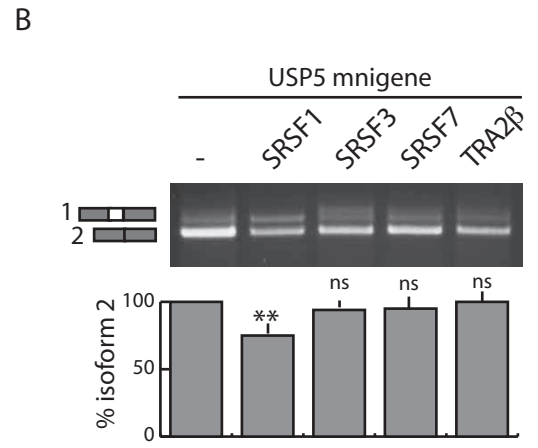

Supplement: supp_gku922_nar-01649-a-2014-File007.pdf [file supp_gku922_nar-01649-a-2014-File007.pdf]
